# Supplementary material for: Liposome-based gene delivery systems containing a steroid derivative: computational and small angle X-ray diffraction study
Source: Royal Society of Chemistry journal article supplement (doi:10.1039/c5ra08439c), 2015-01-01
Supplement: c5ra08439c1.pdf [file c5ra08439c1.pdf]

## Supporting Information

### **Liposome-based gene delivery systems containing a steroid derivative : computational and small angle X ray diffraction study**

*R. Galeazzi\*<sup>1</sup>, P. Bruni<sup>2</sup>, E. Crucianelli<sup>2</sup>, E. Laudadio<sup>1</sup>, M. Marini<sup>2</sup>, L. Massaccesi<sup>1</sup>, G. Mobbili<sup>1</sup>, M. Pisani\*<sup>2</sup>*

<sup>1</sup> Di.S.V.A. Department, Polytechnic University of Marche, Ancona, Italy

<sup>2</sup> SIMAU Department, Polytechnic University of Marche, Ancona, Italy

Corresponding authors:

Dr. Michela Pisani  
Università Politecnica delle Marche  
Dipartimento di Scienze e Ingegneria della Materia, dell'Ambiente e Urbanistica (SIMAU)  
via Brecce Bianche, 60131 Ancona (ITALY)  
e-mail. [m.pisani@univpm.it](mailto:m.pisani@univpm.it)  
tel.: +39-71-2204263

Dr. Roberta Galeazzi  
Università Politecnica delle Marche  
Dipartimento di Scienze della Vita e dell'Ambiente (DISVA)  
via Brecce Bianche, 60131 Ancona (ITALY)  
e-mail. [r.galeazzi@univpm.it](mailto:r.galeazzi@univpm.it)  
tel.: +39-71-2204724

## Synthetic protocols of Cholesteryl 2-(picolinamido)phenylcarbamate (CHOLp).

*N*-(2-nitrophenyl)picolinamide (**3**). A reaction mixture of 2-picolinic acid (**1**) (984 mg, 8 mmol) and 2,4,6-trichloro-1,3,5-triazine (1.46 g, 8 mmol) in THF (25 ml) was allowed to stir for 30' after which a solution of 2-nitroaniline (**2**) (1.10 g, 8 mmol) and triethylamine (2 ml) in THF (25 ml) was added. The resulting dark green mixture was refluxed for 20 h and thereafter cooled and diluted with 1:1 exane/ethylacetate (200 ml). The solution was washed with water (2x100 ml) and brine (100 ml), the organic extracts were dried over anhydrous Na<sub>2</sub>SO<sub>4</sub> and concentrated under reduced pressure. The dark green crude product was then purified over silica gel column (petrol ether/AcOEt, 6/4,v/v) to get the desired product as a yellow solid. (1.57 g, 81% yield).

<sup>1</sup>H NMR (400M, CDCl<sub>3</sub>): δ = 7.23 (m, 1H); 7.53 (m, 1H); 7.71 (m, 1H); 7.93 (m, 1H); 8.28 (m, 2H); 8.74 (d, 1H, J = 4.8 Hz); 9.03 (d, 1H, J = 8.0); 12.75 (bs, 1 H).

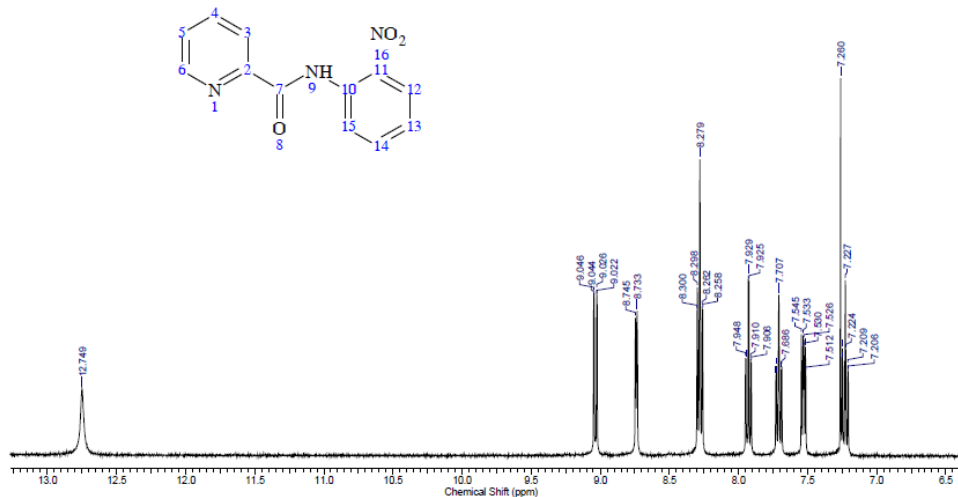

$^{13}\text{C}$ -NMR (400 M,  $\text{CDCl}_3$ ):  $\delta$  =122.04; 122.72; 123.34; 125.89; 126.95; 134.53; 135.70; 137.61; 148.61; 149.30; 163.43.

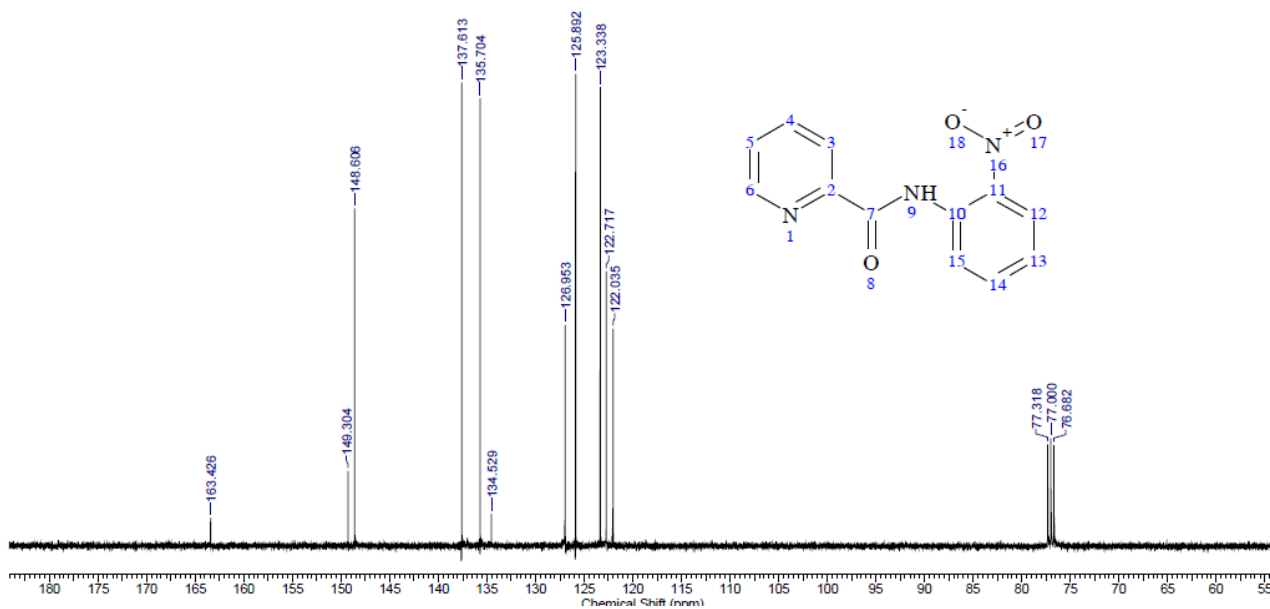

HRMS(ESI<sup>+</sup>):  $m/z$  265.9( $\text{M}^+ + \text{Na}$ ).

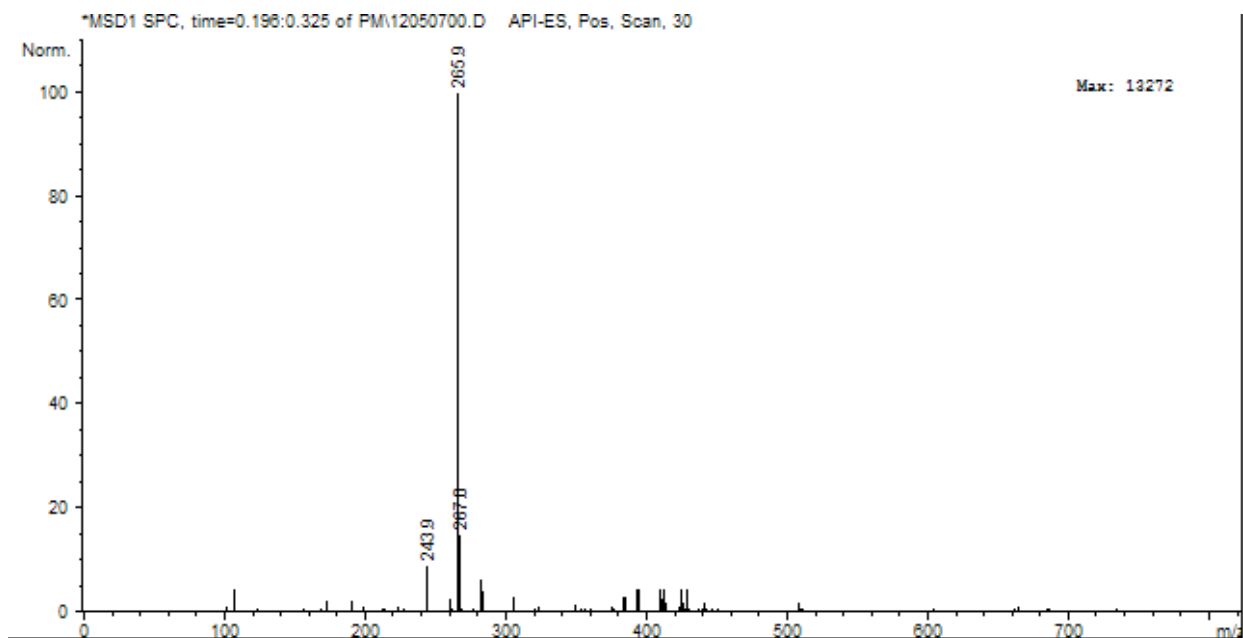

*N*-(2-aminophenyl)picolinamide (**4**). To a solution of *N*-(2-nitrophenyl)picolinamide (**3**) (243 mg, 1 mmol) in 10 ml of dry MeOH, 10%Pd/C-catalyst (243 mg) was added and the mixture stirred and refluxed under H<sub>2</sub> atmosphere. After 3h the solution was filtered through Celite and the solvent was evaporated under reduced pressure. The resulting yellow-brown oil was used directly without purification (173 mg).

<sup>1</sup>H NMR (400M, CDCl<sub>3</sub>): δ = 3.76 (bs, -NH<sub>2</sub>); 6.84 (m, 2H); 7.07 (m, 1H); 7.47 (m, 2H); 7.87 (m, 1H); 8.27 (m, 1H); 8.60 (m, 1H); 9.88 (bs, -NH).

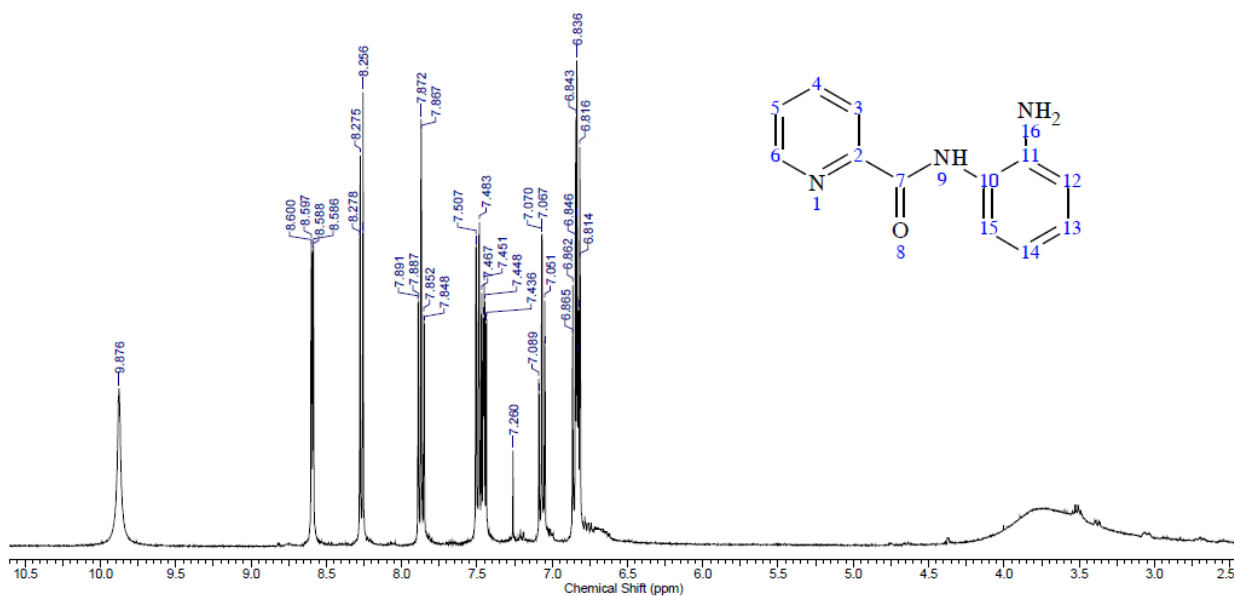

<sup>13</sup>C-NMR (400 M, CDCl<sub>3</sub>): δ = 117.85; 119.38; 122.35; 124.52; 126.36; 126.74; 137.48; 140.27; 148.04; 149.47; 162.28.

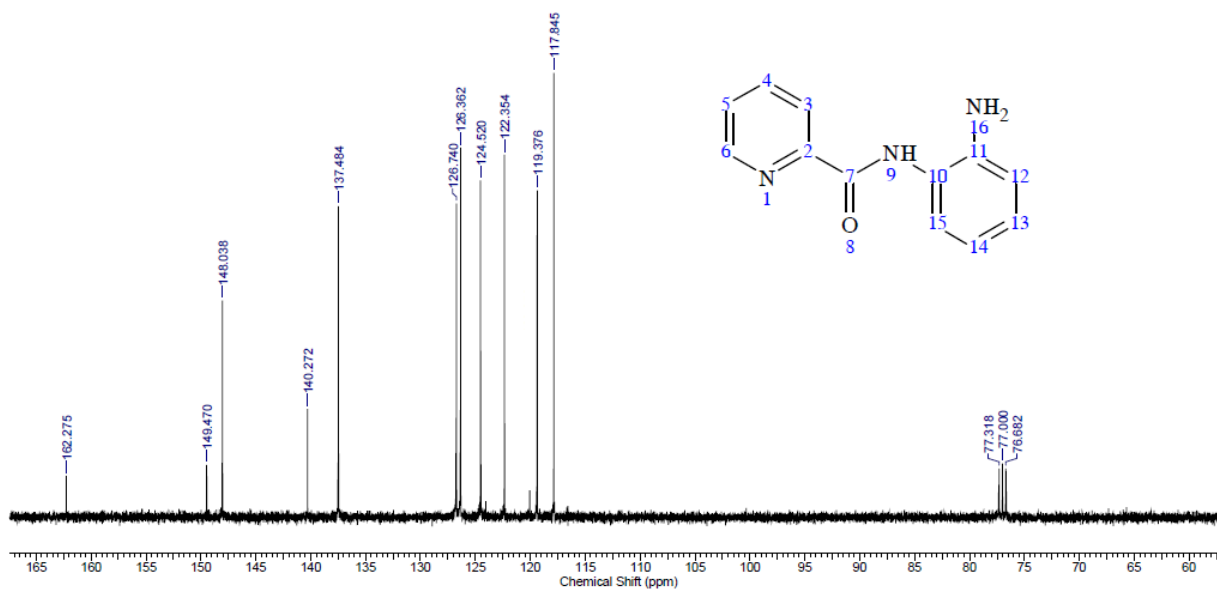

HRMS(ESI<sup>+</sup>): m/z 449.1 (2M<sup>+</sup> + Na).

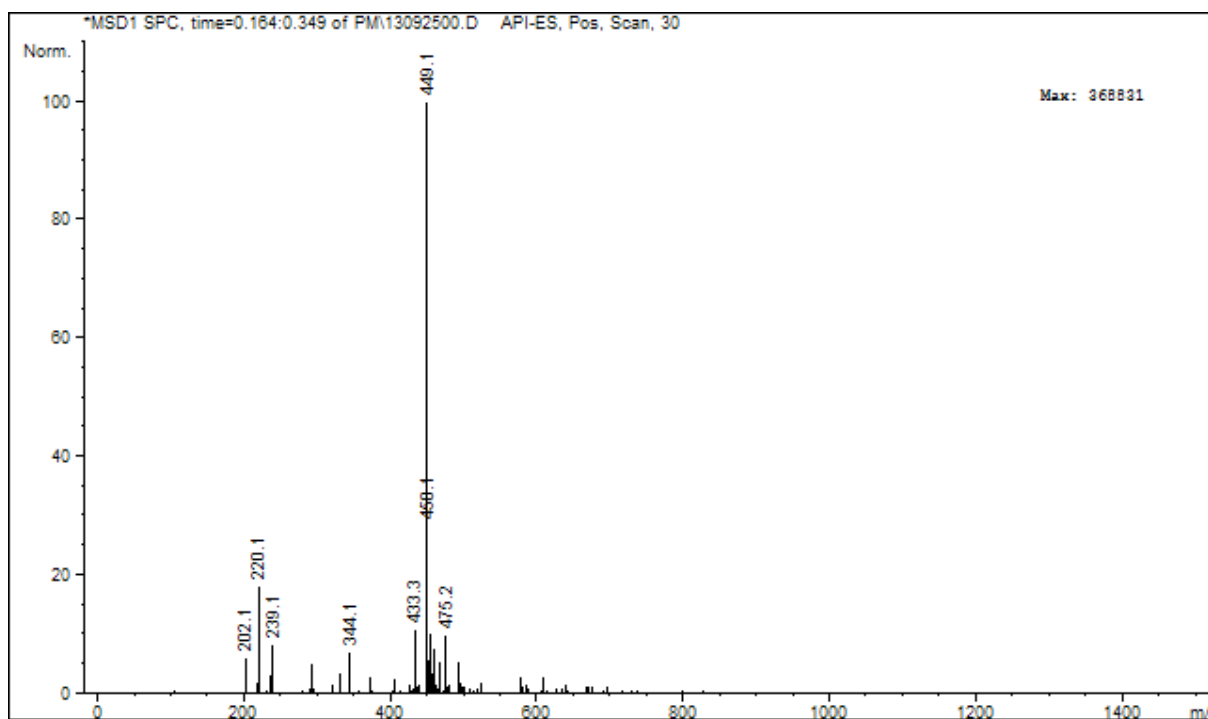

**Cholesteryl 2-(picolinamido)phenylcarbamate (6).** Cholesterylchloroformate (5) (449.12 mg, 1 mmol) was dissolved in a suspension of potassium carbonate (691.05 mg, 5 mmol) in THF(15 ml) and DCM. A solution of *N*-(2-aminophenyl)picolinamide (4) (213 mg, 1 mmol) in THF (2 ml) was added and the reaction mixture was refluxed overnight. After being cooled, it was filtered and the solvent was removed under reduced pressure. The crude product was then purified over silica gel column (petrol ether/AcOEt, 7/3) to get the desired product as a white solid (294.3 g, 47% yield).

**<sup>1</sup>H NMR (400M, CDCl<sub>3</sub>):** δ = 0.67 (s, 3H); 0.86–1.67 (m, 22H); 0.86 (6H, d, J = 6.4 Hz); 0.91 (d, 3H, J = 6.4 Hz); 1.01 (s, 3H); 4.56-4.66 (1H, m, cholesterol 3-H1); 5.35-5.40 (1H, m, cholesterol 6-H1); 7.17-7.29 (2H, m, ArH); 7.39 (1H, broad, -NH); 7.50-7.54 (1H, m, ArH); 7.58-7.64 (1H, m, ArH); 7.67-7.74 (1H, m, ArH); 7.90-7.96 (1H, m, ArH); 8.32 (1H, d, J=7.6, ArH); 8.64 (1H, d, J = 4.8, ArH); 10.14 (1H, s, NH).

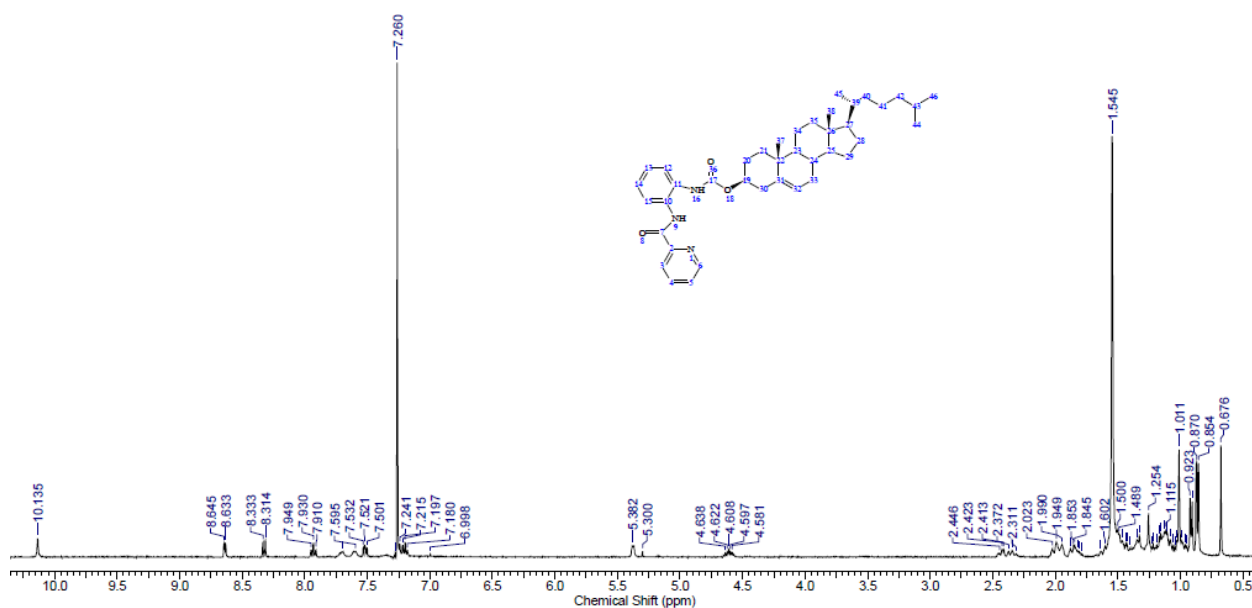

**<sup>13</sup>C-NMR (400 M, CDCl<sub>3</sub>):** δ = 11.82; 18.69; 19.31; 21.01; 22.54; 22.79; 23.80; 24.25; 27.97; 28.19; 29.67; 31.83; 31.88; 35.76; 36.15; 36.55; 36.96; 38.34; 39.48; 39.69; 42.28; 49.96; 56.10; 56.64; 75.16; 122.52; 122.73; 124.24; 124.74; 125.31; 126.38; 126.66; 137.66; 139.74; 148.13; 149.27; 154.04; 162.93.

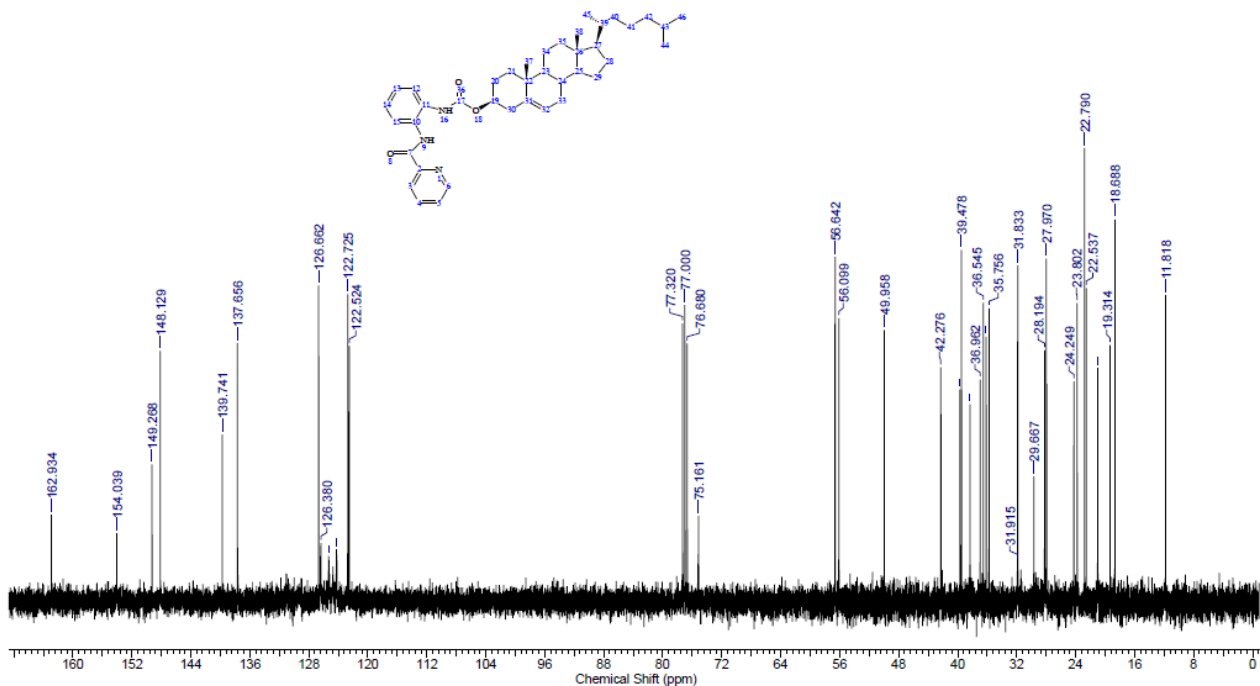

HRMS(ESI<sup>+</sup>): m/z 648.0 (M<sup>+</sup> + 22.9).

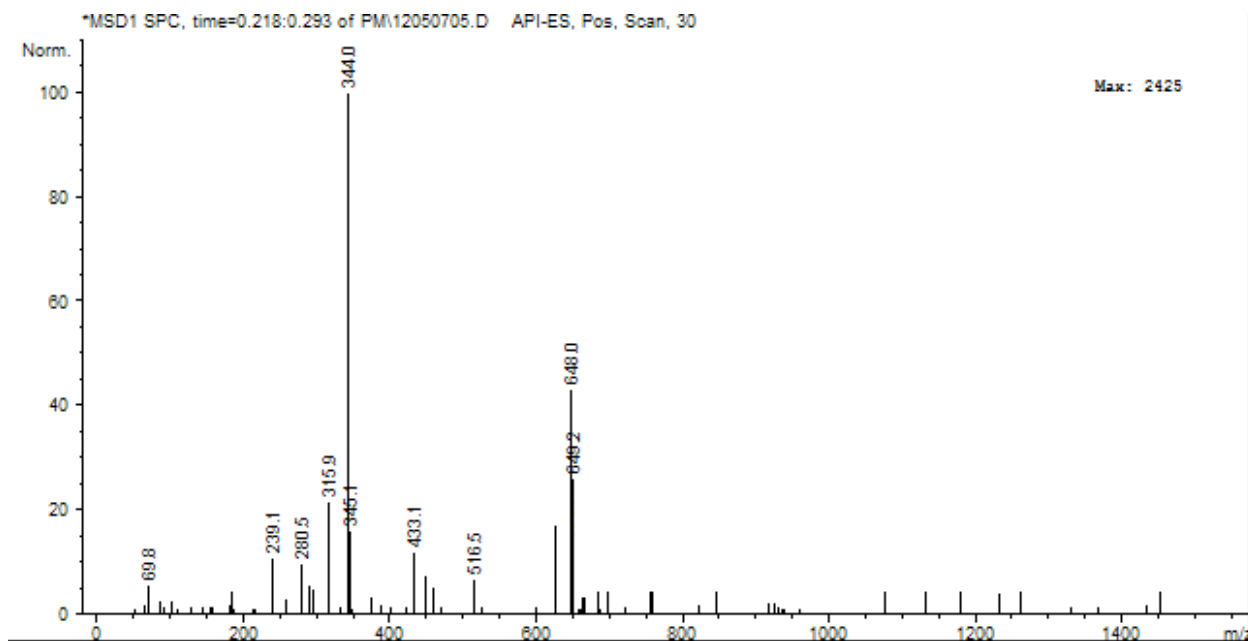

# CHOLp.gro

101

|      |    |    |        |        |       |
|------|----|----|--------|--------|-------|
| 1PIC | C  | 1  | 0.217  | 0.420  | 1.438 |
| 1PIC | C  | 2  | 0.210  | 0.493  | 1.573 |
| 1PIC | C  | 3  | 0.069  | 0.485  | 1.632 |
| 1PIC | C  | 4  | 0.032  | 0.338  | 1.654 |
| 1PIC | C  | 5  | 0.047  | 0.260  | 1.523 |
| 1PIC | C  | 6  | -0.056 | 0.187  | 1.478 |
| 1PIC | C  | 7  | -0.052 | 0.104  | 1.350 |
| 1PIC | C  | 8  | 0.090  | 0.082  | 1.299 |
| 1PIC | C  | 9  | 0.167  | 0.215  | 1.301 |
| 1PIC | C  | 10 | 0.180  | 0.270  | 1.446 |
| 1PIC | C  | 11 | 0.302  | 0.205  | 1.227 |
| 1PIC | C  | 12 | 0.288  | 0.147  | 1.085 |
| 1PIC | C  | 13 | 0.221  | 0.008  | 1.089 |
| 1PIC | C  | 14 | 0.084  | 0.032  | 1.154 |
| 1PIC | C  | 15 | 0.008  | -0.099 | 1.129 |
| 1PIC | C  | 16 | 0.058  | -0.141 | 0.990 |
| 1PIC | C  | 17 | 0.174  | -0.047 | 0.953 |
| 1PIC | C  | 18 | 0.308  | -0.095 | 1.163 |
| 1PIC | C  | 19 | 0.288  | 0.195  | 1.527 |
| 1PIC | C  | 20 | 0.278  | -0.119 | 0.863 |
| 1PIC | C  | 21 | 0.394  | -0.027 | 0.822 |
| 1PIC | C  | 22 | 0.214  | -0.180 | 0.736 |
| 1PIC | C  | 23 | 0.150  | -0.077 | 0.642 |
| 1PIC | C  | 24 | 0.097  | -0.148 | 0.517 |
| 1PIC | C  | 25 | 0.017  | -0.054 | 0.425 |
| 1PIC | C  | 26 | -0.043 | -0.134 | 0.309 |
| 1PIC | C  | 27 | 0.104  | 0.059  | 0.369 |
| 1PIC | CH | 28 | -0.055 | 0.591  | 1.812 |
| 1PIC | O  | 29 | 0.068  | 0.556  | 1.757 |
| 1PIC | O  | 30 | -0.158 | 0.576  | 1.746 |
| 1PIC | N  | 31 | -0.033 | 0.638  | 1.936 |
| 1PIC | H  | 32 | 0.097  | 0.295  | 1.730 |
| 1PIC | H  | 33 | -0.071 | 0.331  | 1.691 |
| 1PIC | H  | 34 | -0.001 | 0.530  | 1.561 |
| 1PIC | H  | 35 | 0.282  | 0.451  | 1.643 |
| 1PIC | H  | 36 | 0.235  | 0.598  | 1.557 |
| 1PIC | H  | 37 | 0.148  | 0.471  | 1.370 |
| 1PIC | H  | 38 | 0.318  | 0.432  | 1.400 |
| 1PIC | H  | 39 | -0.148 | 0.184  | 1.535 |
| 1PIC | H  | 40 | -0.098 | 0.007  | 1.369 |
| 1PIC | H  | 41 | -0.112 | 0.156  | 1.275 |
| 1PIC | H  | 42 | 0.271  | 0.088  | 1.523 |
| 1PIC | H  | 43 | 0.287  | 0.225  | 1.631 |
| 1PIC | H  | 44 | 0.387  | 0.217  | 1.488 |
| 1PIC | H  | 45 | 0.106  | 0.286  | 1.245 |
| 1PIC | H  | 46 | 0.139  | 0.008  | 1.362 |
| 1PIC | H  | 47 | 0.345  | 0.304  | 1.217 |
| 1PIC | H  | 48 | 0.371  | 0.143  | 1.282 |
| 1PIC | H  | 49 | 0.229  | 0.215  | 1.025 |
| 1PIC | H  | 50 | 0.388  | 0.140  | 1.042 |
| 1PIC | H  | 51 | 0.032  | 0.108  | 1.096 |
| 1PIC | H  | 52 | 0.263  | -0.195 | 1.159 |
| 1PIC | H  | 53 | 0.321  | -0.070 | 1.268 |
| 1PIC | H  | 54 | 0.406  | -0.100 | 1.117 |
| 1PIC | H  | 55 | 0.133  | 0.036  | 0.897 |
| 1PIC | H  | 56 | 0.091  | -0.245 | 0.996 |
| 1PIC | H  | 57 | -0.022 | -0.133 | 0.917 |
| 1PIC | H  | 58 | 0.036  | -0.173 | 1.204 |
| 1PIC | H  | 59 | -0.100 | -0.083 | 1.130 |
| 1PIC | H  | 60 | 0.321  | -0.203 | 0.918 |
| 1PIC | H  | 61 | 0.463  | -0.014 | 0.906 |
| 1PIC | H  | 62 | 0.357  | 0.070  | 0.790 |
| 1PIC | H  | 63 | 0.451  | -0.072 | 0.741 |
| 1PIC | H  | 64 | 0.292  | -0.233 | 0.681 |
| 1PIC | H  | 65 | 0.139  | -0.253 | 0.765 |
| 1PIC | H  | 66 | 0.066  | -0.028 | 0.692 |
| 1PIC | H  | 67 | 0.224  | -0.003 | 0.613 |
| 1PIC | H  | 68 | -0.107 | -0.213 | 0.348 |
| 1PIC | H  | 69 | 0.037  | -0.179 | 0.250 |
| 1PIC | H  | 70 | -0.102 | -0.069 | 0.245 |
| 1PIC | H  | 71 | 0.180  | -0.191 | 0.461 |
| 1PIC | H  | 72 | 0.031  | -0.229 | 0.548 |
| 1PIC | H  | 73 | -0.065 | -0.010 | 0.482 |
| 1PIC | H  | 74 | 0.137  | 0.126  | 0.449 |
| 1PIC | H  | 75 | 0.046  | 0.118  | 0.297 |



|          |   |         |        |         |       |
|----------|---|---------|--------|---------|-------|
| 1PIC     | H | 76      | 0.191  | 0.018   | 0.318 |
| 1PIC     | C | 77      | -0.139 | 0.677   | 2.019 |
| 1PIC     | H | 78      | 0.061  | 0.629   | 1.973 |
| 1PIC     | C | 79      | -0.267 | 0.718   | 1.974 |
| 1PIC     | C | 80      | -0.366 | 0.757   | 2.065 |
| 1PIC     | C | 81      | -0.339 | 0.758   | 2.203 |
| 1PIC     | C | 82      | -0.213 | 0.719   | 2.249 |
| 1PIC     | C | 83      | -0.113 | 0.677   | 2.158 |
| 1PIC     | H | 84      | -0.292 | 0.723   | 1.869 |
| 1PIC     | H | 85      | -0.463 | 0.789   | 2.029 |
| 1PIC     | H | 86      | -0.416 | 0.789   | 2.273 |
| 1PIC     | H | 87      | -0.193 | 0.720   | 2.355 |
| 1PIC     | N | 88      | 0.011  | 0.636   | 2.208 |
| 1PIC     | C | 89      | 0.040  | 0.504   | 2.203 |
| 1PIC     | H | 90      | 0.077  | 0.701   | 2.248 |
| 1PIC     | O | 91      | 0.150  | 0.466   | 2.241 |
| 1PIC     | C | 92      | -0.056 | 0.401   | 2.147 |
| 1PIC     | C | 93      | -0.181 | 0.383   | 2.208 |
| 1PIC     | C | 94      | -0.270 | 0.288   | 2.156 |
| 1PIC     | C | 95      | -0.229 | 0.214   | 2.044 |
| 1PIC     | C | 96      | -0.101 | 0.238   | 1.990 |
| 1PIC     | N | 97      | -0.016 | 0.329   | 2.040 |
| 1PIC     | H | 98      | -0.209 | 0.441   | 2.295 |
| 1PIC     | H | 99      | -0.367 | 0.272   | 2.200 |
| 1PIC     | H | 100     | -0.294 | 0.139   | 2.000 |
| 1PIC     | H | 101     | -0.071 | 0.179   | 1.905 |
| -0.07090 |   | 0.17880 |        | 1.90480 |       |

# CHOLp.itp

```
[ moleculetype ]  
; Name          nrexcl  
CPIC            3
```

```
[ atoms ]  
; nr      type  resnr  residue  atom  cgnr  charge  mass  typeB  chargeB  
1         CT    1      PIC      C     1     -0.14510 12.000000  
2         CT    1      PIC      C     2     -0.15810 12.000000  
3         CT    1      PIC      C     3      0.06240 12.000000  
4         CT    1      PIC      C     4     -0.14460 12.000000  
5         CA    1      PIC      C     5     -0.10720 12.000000  
6         CA    1      PIC      C     6     -0.16780 12.000000  
7         CT    1      PIC      C     7     -0.12200 12.000000  
8         CT    1      PIC      C     8     -0.08590 12.000000  
9         CT    1      PIC      C     9     -0.08400 12.000000  
10        CT    1      PIC      C    10      0.00020 12.000000  
11        CT    1      PIC      C    11     -0.15170 12.000000  
12        CT    1      PIC      C    12     -0.14290 12.000000  
13        CT    1      PIC      C    13     -0.04250 12.000000  
14        CT    1      PIC      C    14     -0.10680 12.000000  
15        CT    1      PIC      C    15     -0.15820 12.000000  
16        CT    1      PIC      C    16     -0.15930 12.000000  
17        CT    1      PIC      C    17     -0.09180 12.000000  
18        CT    1      PIC      C    18     -0.19120 12.000000  
19        CT    1      PIC      C    19     -0.19770 12.000000  
20        CT    1      PIC      C    20     -0.09220 12.000000  
21        CT    1      PIC      C    21     -0.20460 12.000000  
22        CT    1      PIC      C    22     -0.15470 12.000000  
23        CT    1      PIC      C    23     -0.15770 12.000000  
24        CT    1      PIC      C    24     -0.15470 12.000000  
25        CT    1      PIC      C    25     -0.11050 12.000000  
26        CT    1      PIC      C    26     -0.20730 12.000000  
27        CT    1      PIC      C    27     -0.20440 12.000000  
28         C    1      PIC      CH    28      0.41050 12.000000  
29        OS    1      PIC      O    29     -0.29930 16.000000  
30         O    1      PIC      O    30     -0.38190 16.000000  
31         N    1      PIC      N    31     -0.29140 14.000000  
32        HC    1      PIC      H    32      0.10370  1.000000  
33        HC    1      PIC      H    33      0.09780  1.000000  
34        H1    1      PIC      H    34      0.10550  1.000000  
35        HC    1      PIC      H    35      0.09650  1.000000  
36        HC    1      PIC      H    36      0.08770  1.000000  
37        HC    1      PIC      H    37      0.08270  1.000000  
38        HC    1      PIC      H    38      0.08540  1.000000  
39        HA    1      PIC      H    39      0.12140  1.000000  
40        HC    1      PIC      H    40      0.08520  1.000000  
41        HC    1      PIC      H    41      0.08910  1.000000  
42        HC    1      PIC      H    42      0.07670  1.000000  
43        HC    1      PIC      H    43      0.07820  1.000000  
44        HC    1      PIC      H    44      0.07200  1.000000  
45        HC    1      PIC      H    45      0.08690  1.000000  
46        HC    1      PIC      H    46      0.09790  1.000000  
47        HC    1      PIC      H    47      0.07630  1.000000  
48        HC    1      PIC      H    48      0.08340  1.000000  
49        HC    1      PIC      H    49      0.07910  1.000000  
50        HC    1      PIC      H    50      0.08100  1.000000  
51        HC    1      PIC      H    51      0.08630  1.000000  
52        HC    1      PIC      H    52      0.07430  1.000000  
53        HC    1      PIC      H    53      0.07420  1.000000  
54        HC    1      PIC      H    54      0.07090  1.000000  
55        HC    1      PIC      H    55      0.08730  1.000000  
56        HC    1      PIC      H    56      0.08130  1.000000  
57        HC    1      PIC      H    57      0.08090  1.000000  
58        HC    1      PIC      H    58      0.08330  1.000000  
59        HC    1      PIC      H    59      0.08200  1.000000  
60        HC    1      PIC      H    60      0.08460  1.000000  
61        HC    1      PIC      H    61      0.07100  1.000000  
62        HC    1      PIC      H    62      0.07460  1.000000  
63        HC    1      PIC      H    63      0.07120  1.000000  
64        HC    1      PIC      H    64      0.07640  1.000000  
65        HC    1      PIC      H    65      0.07760  1.000000  
66        HC    1      PIC      H    66      0.08070  1.000000  
67        HC    1      PIC      H    67      0.08270  1.000000  
68        HC    1      PIC      H    68      0.07100  1.000000  
69        HC    1      PIC      H    69      0.07300  1.000000  
70        HC    1      PIC      H    70      0.07190  1.000000  
71        HC    1      PIC      H    71      0.07960  1.000000  
72        HC    1      PIC      H    72      0.07690  1.000000  
73        HC    1      PIC      H    73      0.08530  1.000000  
74        HC    1      PIC      H    74      0.07220  1.000000  
75        HC    1      PIC      H    75      0.07060  1.000000  
76        HC    1      PIC      H    76      0.07320  1.000000  
77         CA    1      PIC      C    77      0.08660 12.000000  
78         H    1      PIC      H    78      0.27940  1.000000  
79         CA    1      PIC      C    79     -0.13670 12.000000  
80         CA    1      PIC      C    80     -0.10230 12.000000  
81         CA    1      PIC      C    81     -0.14950 12.000000
```

|     |    |   |     |   |     |          |           |
|-----|----|---|-----|---|-----|----------|-----------|
| 82  | CA | 1 | PIC | C | 82  | -0.11410 | 12.000000 |
| 83  | CA | 1 | PIC | C | 83  | -0.02160 | 12.000000 |
| 84  | HA | 1 | PIC | H | 84  | 0.16800  | 1.000000  |
| 85  | HA | 1 | PIC | H | 85  | 0.14180  | 1.000000  |
| 86  | HA | 1 | PIC | H | 86  | 0.13810  | 1.000000  |
| 87  | HA | 1 | PIC | H | 87  | 0.14010  | 1.000000  |
| 88  | N  | 1 | PIC | N | 88  | -0.33970 | 14.000000 |
| 89  | C  | 1 | PIC | C | 89  | 0.34320  | 12.000000 |
| 90  | H  | 1 | PIC | H | 90  | 0.26550  | 1.000000  |
| 91  | O  | 1 | PIC | O | 91  | -0.33800 | 16.000000 |
| 92  | CA | 1 | PIC | C | 92  | -0.04130 | 12.000000 |
| 93  | CA | 1 | PIC | C | 93  | -0.14810 | 12.000000 |
| 94  | CA | 1 | PIC | C | 94  | -0.09240 | 12.000000 |
| 95  | CA | 1 | PIC | C | 95  | -0.16600 | 12.000000 |
| 96  | CA | 1 | PIC | C | 96  | -0.06460 | 12.000000 |
| 97  | NC | 1 | PIC | N | 97  | -0.10510 | 14.000000 |
| 98  | HA | 1 | PIC | H | 98  | 0.14660  | 1.000000  |
| 99  | HA | 1 | PIC | H | 99  | 0.14380  | 1.000000  |
| 100 | HA | 1 | PIC | H | 100 | 0.14520  | 1.000000  |
| 101 | HA | 1 | PIC | H | 101 | 0.16400  | 1.000000  |

[ bonds ]

| ; ai | aj  | funct | r          | k          |
|------|-----|-------|------------|------------|
| 1    | 38  | 1     | 1.0920e-01 | 2.8225e+05 |
| 1    | 37  | 1     | 1.0920e-01 | 2.8225e+05 |
| 2    | 36  | 1     | 1.0920e-01 | 2.8225e+05 |
| 2    | 35  | 1     | 1.0920e-01 | 2.8225e+05 |
| 3    | 34  | 1     | 1.0930e-01 | 2.8108e+05 |
| 4    | 33  | 1     | 1.0920e-01 | 2.8225e+05 |
| 4    | 32  | 1     | 1.0920e-01 | 2.8225e+05 |
| 6    | 39  | 1     | 1.0870e-01 | 2.8811e+05 |
| 7    | 41  | 1     | 1.0920e-01 | 2.8225e+05 |
| 7    | 40  | 1     | 1.0920e-01 | 2.8225e+05 |
| 8    | 46  | 1     | 1.0920e-01 | 2.8225e+05 |
| 9    | 45  | 1     | 1.0920e-01 | 2.8225e+05 |
| 11   | 48  | 1     | 1.0920e-01 | 2.8225e+05 |
| 11   | 47  | 1     | 1.0920e-01 | 2.8225e+05 |
| 12   | 50  | 1     | 1.0920e-01 | 2.8225e+05 |
| 12   | 49  | 1     | 1.0920e-01 | 2.8225e+05 |
| 14   | 51  | 1     | 1.0920e-01 | 2.8225e+05 |
| 15   | 59  | 1     | 1.0920e-01 | 2.8225e+05 |
| 15   | 58  | 1     | 1.0920e-01 | 2.8225e+05 |
| 16   | 57  | 1     | 1.0920e-01 | 2.8225e+05 |
| 16   | 56  | 1     | 1.0920e-01 | 2.8225e+05 |
| 17   | 55  | 1     | 1.0920e-01 | 2.8225e+05 |
| 18   | 54  | 1     | 1.0920e-01 | 2.8225e+05 |
| 18   | 53  | 1     | 1.0920e-01 | 2.8225e+05 |
| 18   | 52  | 1     | 1.0920e-01 | 2.8225e+05 |
| 19   | 44  | 1     | 1.0920e-01 | 2.8225e+05 |
| 19   | 43  | 1     | 1.0920e-01 | 2.8225e+05 |
| 19   | 42  | 1     | 1.0920e-01 | 2.8225e+05 |
| 20   | 60  | 1     | 1.0920e-01 | 2.8225e+05 |
| 21   | 63  | 1     | 1.0920e-01 | 2.8225e+05 |
| 21   | 62  | 1     | 1.0920e-01 | 2.8225e+05 |
| 21   | 61  | 1     | 1.0920e-01 | 2.8225e+05 |
| 22   | 65  | 1     | 1.0920e-01 | 2.8225e+05 |
| 22   | 64  | 1     | 1.0920e-01 | 2.8225e+05 |
| 23   | 67  | 1     | 1.0920e-01 | 2.8225e+05 |
| 23   | 66  | 1     | 1.0920e-01 | 2.8225e+05 |
| 24   | 72  | 1     | 1.0920e-01 | 2.8225e+05 |
| 24   | 71  | 1     | 1.0920e-01 | 2.8225e+05 |
| 25   | 73  | 1     | 1.0920e-01 | 2.8225e+05 |
| 26   | 70  | 1     | 1.0920e-01 | 2.8225e+05 |
| 26   | 69  | 1     | 1.0920e-01 | 2.8225e+05 |
| 26   | 68  | 1     | 1.0920e-01 | 2.8225e+05 |
| 27   | 76  | 1     | 1.0920e-01 | 2.8225e+05 |
| 27   | 75  | 1     | 1.0920e-01 | 2.8225e+05 |
| 27   | 74  | 1     | 1.0920e-01 | 2.8225e+05 |
| 31   | 78  | 1     | 1.0090e-01 | 3.4326e+05 |
| 79   | 84  | 1     | 1.0870e-01 | 2.8811e+05 |
| 80   | 85  | 1     | 1.0870e-01 | 2.8811e+05 |
| 81   | 86  | 1     | 1.0870e-01 | 2.8811e+05 |
| 82   | 87  | 1     | 1.0870e-01 | 2.8811e+05 |
| 88   | 90  | 1     | 1.0090e-01 | 3.4326e+05 |
| 93   | 98  | 1     | 1.0870e-01 | 2.8811e+05 |
| 94   | 99  | 1     | 1.0870e-01 | 2.8811e+05 |
| 95   | 100 | 1     | 1.0870e-01 | 2.8811e+05 |
| 96   | 101 | 1     | 1.0880e-01 | 2.8694e+05 |
| 1    | 10  | 1     | 1.5350e-01 | 2.5363e+05 |
| 1    | 2   | 1     | 1.5350e-01 | 2.5363e+05 |
| 2    | 3   | 1     | 1.5350e-01 | 2.5363e+05 |
| 3    | 4   | 1     | 1.5350e-01 | 2.5363e+05 |
| 3    | 29  | 1     | 1.4390e-01 | 2.5230e+05 |
| 4    | 5   | 1     | 1.5080e-01 | 2.7472e+05 |
| 5    | 6   | 1     | 1.3240e-01 | 4.9346e+05 |
| 5    | 10  | 1     | 1.5080e-01 | 2.7472e+05 |
| 6    | 7   | 1     | 1.5080e-01 | 2.7472e+05 |
| 7    | 8   | 1     | 1.5350e-01 | 2.5363e+05 |
| 8    | 14  | 1     | 1.5350e-01 | 2.5363e+05 |
| 8    | 9   | 1     | 1.5350e-01 | 2.5363e+05 |

|    |    |   |            |            |
|----|----|---|------------|------------|
| 9  | 10 | 1 | 1.5350e-01 | 2.5363e+05 |
| 9  | 11 | 1 | 1.5350e-01 | 2.5363e+05 |
| 10 | 19 | 1 | 1.5350e-01 | 2.5363e+05 |
| 11 | 12 | 1 | 1.5350e-01 | 2.5363e+05 |
| 12 | 13 | 1 | 1.5350e-01 | 2.5363e+05 |
| 13 | 18 | 1 | 1.5350e-01 | 2.5363e+05 |
| 13 | 17 | 1 | 1.5350e-01 | 2.5363e+05 |
| 13 | 14 | 1 | 1.5350e-01 | 2.5363e+05 |
| 14 | 15 | 1 | 1.5350e-01 | 2.5363e+05 |
| 15 | 16 | 1 | 1.5350e-01 | 2.5363e+05 |
| 16 | 17 | 1 | 1.5350e-01 | 2.5363e+05 |
| 17 | 20 | 1 | 1.5350e-01 | 2.5363e+05 |
| 20 | 22 | 1 | 1.5350e-01 | 2.5363e+05 |
| 20 | 21 | 1 | 1.5350e-01 | 2.5363e+05 |
| 22 | 23 | 1 | 1.5350e-01 | 2.5363e+05 |
| 23 | 24 | 1 | 1.5350e-01 | 2.5363e+05 |
| 24 | 25 | 1 | 1.5350e-01 | 2.5363e+05 |
| 25 | 27 | 1 | 1.5350e-01 | 2.5363e+05 |
| 25 | 26 | 1 | 1.5350e-01 | 2.5363e+05 |
| 28 | 29 | 1 | 1.3430e-01 | 3.4418e+05 |
| 28 | 31 | 1 | 1.3450e-01 | 4.0016e+05 |
| 28 | 30 | 1 | 1.2140e-01 | 5.4225e+05 |
| 31 | 77 | 1 | 1.4220e-01 | 3.1154e+05 |
| 77 | 83 | 1 | 1.3870e-01 | 4.0033e+05 |
| 77 | 79 | 1 | 1.3870e-01 | 4.0033e+05 |
| 79 | 80 | 1 | 1.3870e-01 | 4.0033e+05 |
| 80 | 81 | 1 | 1.3870e-01 | 4.0033e+05 |
| 81 | 82 | 1 | 1.3870e-01 | 4.0033e+05 |
| 82 | 83 | 1 | 1.3870e-01 | 4.0033e+05 |
| 83 | 88 | 1 | 1.4220e-01 | 3.1154e+05 |
| 88 | 89 | 1 | 1.3450e-01 | 4.0016e+05 |
| 89 | 92 | 1 | 1.4870e-01 | 2.9263e+05 |
| 89 | 91 | 1 | 1.2140e-01 | 5.4225e+05 |
| 92 | 97 | 1 | 1.3420e-01 | 4.0426e+05 |
| 92 | 93 | 1 | 1.3870e-01 | 4.0033e+05 |
| 93 | 94 | 1 | 1.3870e-01 | 4.0033e+05 |
| 94 | 95 | 1 | 1.3870e-01 | 4.0033e+05 |
| 95 | 96 | 1 | 1.3870e-01 | 4.0033e+05 |
| 96 | 97 | 1 | 1.3420e-01 | 4.0426e+05 |

```
[ pairs ]
; ai aj funct
1 44 1
1 43 1
1 42 1
1 45 1
1 34 1
2 33 1
2 32 1
38 3 1
37 3 1
4 39 1
4 36 1
4 35 1
5 41 1
5 40 1
38 5 1
37 5 1
5 44 1
5 43 1
5 42 1
5 45 1
5 34 1
6 46 1
6 33 1
6 32 1
7 51 1
7 45 1
8 59 1
8 58 1
8 48 1
8 47 1
8 39 1
38 9 1
37 9 1
9 44 1
9 43 1
9 42 1
9 50 1
9 49 1
9 51 1
9 41 1
9 40 1
10 36 1
10 35 1
10 48 1
10 47 1
10 46 1
10 39 1
10 33 1
```

|    |    |   |
|----|----|---|
| 10 | 32 | 1 |
| 11 | 46 | 1 |
| 12 | 45 | 1 |
| 12 | 54 | 1 |
| 12 | 53 | 1 |
| 12 | 52 | 1 |
| 12 | 55 | 1 |
| 12 | 51 | 1 |
| 13 | 48 | 1 |
| 13 | 47 | 1 |
| 13 | 60 | 1 |
| 13 | 57 | 1 |
| 13 | 56 | 1 |
| 13 | 59 | 1 |
| 13 | 58 | 1 |
| 13 | 46 | 1 |
| 14 | 57 | 1 |
| 14 | 56 | 1 |
| 14 | 50 | 1 |
| 14 | 49 | 1 |
| 14 | 54 | 1 |
| 14 | 53 | 1 |
| 14 | 52 | 1 |
| 14 | 55 | 1 |
| 14 | 45 | 1 |
| 14 | 41 | 1 |
| 14 | 40 | 1 |
| 15 | 55 | 1 |
| 15 | 46 | 1 |
| 16 | 60 | 1 |
| 16 | 51 | 1 |
| 17 | 50 | 1 |
| 17 | 49 | 1 |
| 17 | 54 | 1 |
| 17 | 53 | 1 |
| 17 | 52 | 1 |
| 17 | 51 | 1 |
| 17 | 65 | 1 |
| 17 | 64 | 1 |
| 17 | 63 | 1 |
| 17 | 62 | 1 |
| 17 | 61 | 1 |
| 17 | 59 | 1 |
| 17 | 58 | 1 |
| 18 | 50 | 1 |
| 18 | 49 | 1 |
| 18 | 55 | 1 |
| 18 | 51 | 1 |
| 38 | 19 | 1 |
| 37 | 19 | 1 |
| 19 | 45 | 1 |
| 20 | 57 | 1 |
| 20 | 56 | 1 |
| 20 | 67 | 1 |
| 20 | 66 | 1 |
| 21 | 55 | 1 |
| 21 | 65 | 1 |
| 21 | 64 | 1 |
| 22 | 55 | 1 |
| 22 | 63 | 1 |
| 22 | 62 | 1 |
| 22 | 61 | 1 |
| 22 | 72 | 1 |
| 22 | 71 | 1 |
| 23 | 60 | 1 |
| 23 | 73 | 1 |
| 24 | 65 | 1 |
| 24 | 64 | 1 |
| 24 | 76 | 1 |
| 24 | 75 | 1 |
| 24 | 74 | 1 |
| 24 | 70 | 1 |
| 24 | 69 | 1 |
| 24 | 68 | 1 |
| 25 | 67 | 1 |
| 25 | 66 | 1 |
| 26 | 72 | 1 |
| 26 | 71 | 1 |
| 26 | 76 | 1 |
| 26 | 75 | 1 |
| 26 | 74 | 1 |
| 27 | 72 | 1 |
| 27 | 71 | 1 |
| 27 | 70 | 1 |
| 27 | 69 | 1 |
| 27 | 68 | 1 |
| 28 | 34 | 1 |
| 29 | 33 | 1 |
| 29 | 32 | 1 |
| 29 | 36 | 1 |

|     |     |   |
|-----|-----|---|
| 29  | 35  | 1 |
| 29  | 78  | 1 |
| 30  | 78  | 1 |
| 31  | 84  | 1 |
| 32  | 34  | 1 |
| 33  | 34  | 1 |
| 34  | 36  | 1 |
| 34  | 35  | 1 |
| 38  | 35  | 1 |
| 37  | 35  | 1 |
| 38  | 36  | 1 |
| 37  | 36  | 1 |
| 39  | 41  | 1 |
| 39  | 40  | 1 |
| 40  | 46  | 1 |
| 41  | 46  | 1 |
| 45  | 48  | 1 |
| 45  | 47  | 1 |
| 45  | 46  | 1 |
| 46  | 51  | 1 |
| 47  | 50  | 1 |
| 47  | 49  | 1 |
| 48  | 50  | 1 |
| 48  | 49  | 1 |
| 51  | 59  | 1 |
| 51  | 58  | 1 |
| 55  | 60  | 1 |
| 55  | 57  | 1 |
| 55  | 56  | 1 |
| 56  | 59  | 1 |
| 56  | 58  | 1 |
| 57  | 59  | 1 |
| 57  | 58  | 1 |
| 60  | 65  | 1 |
| 60  | 64  | 1 |
| 60  | 63  | 1 |
| 60  | 62  | 1 |
| 60  | 61  | 1 |
| 64  | 67  | 1 |
| 64  | 66  | 1 |
| 65  | 67  | 1 |
| 65  | 66  | 1 |
| 66  | 72  | 1 |
| 66  | 71  | 1 |
| 67  | 72  | 1 |
| 67  | 71  | 1 |
| 68  | 73  | 1 |
| 69  | 73  | 1 |
| 70  | 73  | 1 |
| 71  | 73  | 1 |
| 72  | 73  | 1 |
| 73  | 76  | 1 |
| 73  | 75  | 1 |
| 73  | 74  | 1 |
| 77  | 90  | 1 |
| 77  | 87  | 1 |
| 77  | 85  | 1 |
| 78  | 83  | 1 |
| 78  | 79  | 1 |
| 79  | 86  | 1 |
| 80  | 87  | 1 |
| 81  | 84  | 1 |
| 82  | 90  | 1 |
| 82  | 85  | 1 |
| 83  | 84  | 1 |
| 83  | 86  | 1 |
| 84  | 85  | 1 |
| 85  | 86  | 1 |
| 86  | 87  | 1 |
| 87  | 88  | 1 |
| 89  | 98  | 1 |
| 90  | 92  | 1 |
| 90  | 91  | 1 |
| 92  | 101 | 1 |
| 92  | 99  | 1 |
| 93  | 100 | 1 |
| 94  | 101 | 1 |
| 95  | 98  | 1 |
| 96  | 99  | 1 |
| 97  | 98  | 1 |
| 97  | 100 | 1 |
| 98  | 99  | 1 |
| 99  | 100 | 1 |
| 100 | 101 | 1 |
| 1   | 11  | 1 |
| 1   | 8   | 1 |
| 1   | 6   | 1 |
| 1   | 4   | 1 |
| 1   | 29  | 1 |
| 2   | 5   | 1 |

|    |    |   |
|----|----|---|
| 2  | 28 | 1 |
| 2  | 19 | 1 |
| 2  | 9  | 1 |
| 3  | 6  | 1 |
| 3  | 10 | 1 |
| 3  | 31 | 1 |
| 3  | 30 | 1 |
| 4  | 7  | 1 |
| 4  | 19 | 1 |
| 4  | 9  | 1 |
| 4  | 28 | 1 |
| 5  | 8  | 1 |
| 5  | 11 | 1 |
| 5  | 29 | 1 |
| 6  | 14 | 1 |
| 6  | 9  | 1 |
| 6  | 19 | 1 |
| 7  | 15 | 1 |
| 7  | 13 | 1 |
| 7  | 10 | 1 |
| 7  | 11 | 1 |
| 8  | 16 | 1 |
| 8  | 12 | 1 |
| 8  | 18 | 1 |
| 8  | 17 | 1 |
| 8  | 19 | 1 |
| 9  | 13 | 1 |
| 9  | 15 | 1 |
| 10 | 12 | 1 |
| 10 | 14 | 1 |
| 11 | 19 | 1 |
| 11 | 14 | 1 |
| 11 | 18 | 1 |
| 11 | 17 | 1 |
| 12 | 20 | 1 |
| 12 | 16 | 1 |
| 12 | 15 | 1 |
| 13 | 22 | 1 |
| 13 | 21 | 1 |
| 14 | 20 | 1 |
| 15 | 20 | 1 |
| 15 | 18 | 1 |
| 16 | 18 | 1 |
| 16 | 22 | 1 |
| 16 | 21 | 1 |
| 17 | 23 | 1 |
| 18 | 20 | 1 |
| 20 | 24 | 1 |
| 21 | 23 | 1 |
| 22 | 25 | 1 |
| 23 | 27 | 1 |
| 23 | 26 | 1 |
| 28 | 83 | 1 |
| 28 | 79 | 1 |
| 29 | 77 | 1 |
| 30 | 77 | 1 |
| 31 | 88 | 1 |
| 31 | 82 | 1 |
| 31 | 80 | 1 |
| 77 | 89 | 1 |
| 77 | 81 | 1 |
| 79 | 82 | 1 |
| 79 | 88 | 1 |
| 80 | 83 | 1 |
| 81 | 88 | 1 |
| 82 | 89 | 1 |
| 83 | 92 | 1 |
| 83 | 91 | 1 |
| 88 | 97 | 1 |
| 88 | 93 | 1 |
| 89 | 96 | 1 |
| 89 | 94 | 1 |
| 91 | 97 | 1 |
| 91 | 93 | 1 |
| 92 | 95 | 1 |
| 93 | 96 | 1 |
| 94 | 97 | 1 |

[ angles ]

| ; | ai | aj | ak | funct | theta      | cth        |
|---|----|----|----|-------|------------|------------|
|   | 1  | 2  | 36 | 1     | 1.1005e+02 | 3.8802e+02 |
|   | 1  | 2  | 35 | 1     | 1.1005e+02 | 3.8802e+02 |
|   | 2  | 3  | 34 | 1     | 1.1007e+02 | 3.8794e+02 |
|   | 2  | 1  | 38 | 1     | 1.1005e+02 | 3.8802e+02 |
|   | 2  | 1  | 37 | 1     | 1.1005e+02 | 3.8802e+02 |
|   | 3  | 4  | 33 | 1     | 1.1005e+02 | 3.8802e+02 |
|   | 3  | 4  | 32 | 1     | 1.1005e+02 | 3.8802e+02 |
|   | 3  | 2  | 36 | 1     | 1.1005e+02 | 3.8802e+02 |
|   | 3  | 2  | 35 | 1     | 1.1005e+02 | 3.8802e+02 |
|   | 4  | 3  | 34 | 1     | 1.1007e+02 | 3.8794e+02 |

|    |    |    |   |            |            |
|----|----|----|---|------------|------------|
| 5  | 6  | 39 | 1 | 1.2094e+02 | 4.1873e+02 |
| 5  | 4  | 33 | 1 | 1.1049e+02 | 3.9355e+02 |
| 5  | 4  | 32 | 1 | 1.1049e+02 | 3.9355e+02 |
| 6  | 7  | 41 | 1 | 1.1049e+02 | 3.9355e+02 |
| 6  | 7  | 40 | 1 | 1.1049e+02 | 3.9355e+02 |
| 7  | 8  | 46 | 1 | 1.1005e+02 | 3.8802e+02 |
| 7  | 6  | 39 | 1 | 1.1730e+02 | 3.8208e+02 |
| 8  | 14 | 51 | 1 | 1.1005e+02 | 3.8802e+02 |
| 8  | 9  | 45 | 1 | 1.1005e+02 | 3.8802e+02 |
| 8  | 7  | 41 | 1 | 1.1005e+02 | 3.8802e+02 |
| 8  | 7  | 40 | 1 | 1.1005e+02 | 3.8802e+02 |
| 9  | 11 | 48 | 1 | 1.1005e+02 | 3.8802e+02 |
| 9  | 11 | 47 | 1 | 1.1005e+02 | 3.8802e+02 |
| 9  | 8  | 46 | 1 | 1.1005e+02 | 3.8802e+02 |
| 10 | 1  | 38 | 1 | 1.1005e+02 | 3.8802e+02 |
| 10 | 1  | 37 | 1 | 1.1005e+02 | 3.8802e+02 |
| 10 | 19 | 44 | 1 | 1.1005e+02 | 3.8802e+02 |
| 10 | 19 | 43 | 1 | 1.1005e+02 | 3.8802e+02 |
| 10 | 19 | 42 | 1 | 1.1005e+02 | 3.8802e+02 |
| 10 | 9  | 45 | 1 | 1.1005e+02 | 3.8802e+02 |
| 11 | 9  | 45 | 1 | 1.1005e+02 | 3.8802e+02 |
| 11 | 12 | 50 | 1 | 1.1005e+02 | 3.8802e+02 |
| 11 | 12 | 49 | 1 | 1.1005e+02 | 3.8802e+02 |
| 12 | 11 | 48 | 1 | 1.1005e+02 | 3.8802e+02 |
| 12 | 11 | 47 | 1 | 1.1005e+02 | 3.8802e+02 |
| 13 | 12 | 50 | 1 | 1.1005e+02 | 3.8802e+02 |
| 13 | 12 | 49 | 1 | 1.1005e+02 | 3.8802e+02 |
| 13 | 18 | 54 | 1 | 1.1005e+02 | 3.8802e+02 |
| 13 | 18 | 53 | 1 | 1.1005e+02 | 3.8802e+02 |
| 13 | 18 | 52 | 1 | 1.1005e+02 | 3.8802e+02 |
| 13 | 17 | 55 | 1 | 1.1005e+02 | 3.8802e+02 |
| 13 | 14 | 51 | 1 | 1.1005e+02 | 3.8802e+02 |
| 14 | 15 | 59 | 1 | 1.1005e+02 | 3.8802e+02 |
| 14 | 15 | 58 | 1 | 1.1005e+02 | 3.8802e+02 |
| 14 | 8  | 46 | 1 | 1.1005e+02 | 3.8802e+02 |
| 15 | 16 | 57 | 1 | 1.1005e+02 | 3.8802e+02 |
| 15 | 16 | 56 | 1 | 1.1005e+02 | 3.8802e+02 |
| 15 | 14 | 51 | 1 | 1.1005e+02 | 3.8802e+02 |
| 16 | 17 | 55 | 1 | 1.1005e+02 | 3.8802e+02 |
| 16 | 15 | 59 | 1 | 1.1005e+02 | 3.8802e+02 |
| 16 | 15 | 58 | 1 | 1.1005e+02 | 3.8802e+02 |
| 17 | 20 | 60 | 1 | 1.1005e+02 | 3.8802e+02 |
| 17 | 16 | 57 | 1 | 1.1005e+02 | 3.8802e+02 |
| 17 | 16 | 56 | 1 | 1.1005e+02 | 3.8802e+02 |
| 20 | 17 | 55 | 1 | 1.1005e+02 | 3.8802e+02 |
| 20 | 22 | 65 | 1 | 1.1005e+02 | 3.8802e+02 |
| 20 | 22 | 64 | 1 | 1.1005e+02 | 3.8802e+02 |
| 20 | 21 | 63 | 1 | 1.1005e+02 | 3.8802e+02 |
| 20 | 21 | 62 | 1 | 1.1005e+02 | 3.8802e+02 |
| 20 | 21 | 61 | 1 | 1.1005e+02 | 3.8802e+02 |
| 21 | 20 | 60 | 1 | 1.1005e+02 | 3.8802e+02 |
| 22 | 20 | 60 | 1 | 1.1005e+02 | 3.8802e+02 |
| 22 | 23 | 67 | 1 | 1.1005e+02 | 3.8802e+02 |
| 22 | 23 | 66 | 1 | 1.1005e+02 | 3.8802e+02 |
| 23 | 22 | 65 | 1 | 1.1005e+02 | 3.8802e+02 |
| 23 | 22 | 64 | 1 | 1.1005e+02 | 3.8802e+02 |
| 23 | 24 | 72 | 1 | 1.1005e+02 | 3.8802e+02 |
| 23 | 24 | 71 | 1 | 1.1005e+02 | 3.8802e+02 |
| 24 | 23 | 67 | 1 | 1.1005e+02 | 3.8802e+02 |
| 24 | 23 | 66 | 1 | 1.1005e+02 | 3.8802e+02 |
| 24 | 25 | 73 | 1 | 1.1005e+02 | 3.8802e+02 |
| 25 | 24 | 72 | 1 | 1.1005e+02 | 3.8802e+02 |
| 25 | 24 | 71 | 1 | 1.1005e+02 | 3.8802e+02 |
| 25 | 27 | 76 | 1 | 1.1005e+02 | 3.8802e+02 |
| 25 | 27 | 75 | 1 | 1.1005e+02 | 3.8802e+02 |
| 25 | 27 | 74 | 1 | 1.1005e+02 | 3.8802e+02 |
| 25 | 26 | 70 | 1 | 1.1005e+02 | 3.8802e+02 |
| 25 | 26 | 69 | 1 | 1.1005e+02 | 3.8802e+02 |
| 25 | 26 | 68 | 1 | 1.1005e+02 | 3.8802e+02 |
| 26 | 25 | 73 | 1 | 1.1005e+02 | 3.8802e+02 |
| 27 | 25 | 73 | 1 | 1.1005e+02 | 3.8802e+02 |
| 28 | 31 | 78 | 1 | 1.1846e+02 | 4.1179e+02 |
| 29 | 3  | 34 | 1 | 1.0882e+02 | 4.2543e+02 |
| 32 | 4  | 33 | 1 | 1.0835e+02 | 3.2995e+02 |
| 35 | 2  | 36 | 1 | 1.0835e+02 | 3.2995e+02 |
| 37 | 1  | 38 | 1 | 1.0835e+02 | 3.2995e+02 |
| 40 | 7  | 41 | 1 | 1.0835e+02 | 3.2995e+02 |
| 42 | 19 | 44 | 1 | 1.0835e+02 | 3.2995e+02 |
| 42 | 19 | 43 | 1 | 1.0835e+02 | 3.2995e+02 |
| 43 | 19 | 44 | 1 | 1.0835e+02 | 3.2995e+02 |
| 47 | 11 | 48 | 1 | 1.0835e+02 | 3.2995e+02 |
| 49 | 12 | 50 | 1 | 1.0835e+02 | 3.2995e+02 |
| 52 | 18 | 54 | 1 | 1.0835e+02 | 3.2995e+02 |
| 52 | 18 | 53 | 1 | 1.0835e+02 | 3.2995e+02 |
| 53 | 18 | 54 | 1 | 1.0835e+02 | 3.2995e+02 |
| 56 | 16 | 57 | 1 | 1.0835e+02 | 3.2995e+02 |
| 58 | 15 | 59 | 1 | 1.0835e+02 | 3.2995e+02 |
| 61 | 21 | 63 | 1 | 1.0835e+02 | 3.2995e+02 |
| 61 | 21 | 62 | 1 | 1.0835e+02 | 3.2995e+02 |
| 62 | 21 | 63 | 1 | 1.0835e+02 | 3.2995e+02 |



|    |    |     |   |            |            |
|----|----|-----|---|------------|------------|
| 64 | 22 | 65  | 1 | 1.0835e+02 | 3.2995e+02 |
| 66 | 23 | 67  | 1 | 1.0835e+02 | 3.2995e+02 |
| 68 | 26 | 70  | 1 | 1.0835e+02 | 3.2995e+02 |
| 68 | 26 | 69  | 1 | 1.0835e+02 | 3.2995e+02 |
| 69 | 26 | 70  | 1 | 1.0835e+02 | 3.2995e+02 |
| 71 | 24 | 72  | 1 | 1.0835e+02 | 3.2995e+02 |
| 74 | 27 | 76  | 1 | 1.0835e+02 | 3.2995e+02 |
| 74 | 27 | 75  | 1 | 1.0835e+02 | 3.2995e+02 |
| 75 | 27 | 76  | 1 | 1.0835e+02 | 3.2995e+02 |
| 77 | 31 | 78  | 1 | 1.1594e+02 | 3.9631e+02 |
| 77 | 79 | 84  | 1 | 1.2001e+02 | 4.0551e+02 |
| 79 | 80 | 85  | 1 | 1.2001e+02 | 4.0551e+02 |
| 80 | 81 | 86  | 1 | 1.2001e+02 | 4.0551e+02 |
| 80 | 79 | 84  | 1 | 1.2001e+02 | 4.0551e+02 |
| 81 | 82 | 87  | 1 | 1.2001e+02 | 4.0551e+02 |
| 81 | 80 | 85  | 1 | 1.2001e+02 | 4.0551e+02 |
| 82 | 81 | 86  | 1 | 1.2001e+02 | 4.0551e+02 |
| 83 | 88 | 90  | 1 | 1.1594e+02 | 3.9631e+02 |
| 83 | 82 | 87  | 1 | 1.2001e+02 | 4.0551e+02 |
| 89 | 88 | 90  | 1 | 1.1846e+02 | 4.1179e+02 |
| 92 | 93 | 98  | 1 | 1.2001e+02 | 4.0551e+02 |
| 93 | 94 | 99  | 1 | 1.2001e+02 | 4.0551e+02 |
| 94 | 95 | 100 | 1 | 1.2001e+02 | 4.0551e+02 |
| 94 | 93 | 98  | 1 | 1.2001e+02 | 4.0551e+02 |
| 95 | 96 | 101 | 1 | 1.2109e+02 | 4.0367e+02 |
| 95 | 94 | 99  | 1 | 1.2001e+02 | 4.0551e+02 |
| 96 | 95 | 100 | 1 | 1.2001e+02 | 4.0551e+02 |
| 97 | 96 | 101 | 1 | 1.1594e+02 | 4.3363e+02 |
| 1  | 10 | 19  | 1 | 1.1063e+02 | 5.2894e+02 |
| 1  | 10 | 9   | 1 | 1.1063e+02 | 5.2894e+02 |
| 1  | 10 | 5   | 1 | 1.1144e+02 | 5.3162e+02 |
| 1  | 2  | 3   | 1 | 1.1063e+02 | 5.2894e+02 |
| 2  | 3  | 4   | 1 | 1.1063e+02 | 5.2894e+02 |
| 2  | 3  | 29  | 1 | 1.0842e+02 | 5.6718e+02 |
| 2  | 1  | 10  | 1 | 1.1063e+02 | 5.2894e+02 |
| 3  | 4  | 5   | 1 | 1.1144e+02 | 5.3162e+02 |
| 3  | 29 | 28  | 1 | 1.1514e+02 | 5.3246e+02 |
| 4  | 5  | 6   | 1 | 1.2342e+02 | 5.3831e+02 |
| 4  | 5  | 10  | 1 | 1.1652e+02 | 5.2467e+02 |
| 4  | 3  | 29  | 1 | 1.0842e+02 | 5.6718e+02 |
| 5  | 6  | 7   | 1 | 1.2342e+02 | 5.3831e+02 |
| 5  | 10 | 19  | 1 | 1.1144e+02 | 5.3162e+02 |
| 5  | 10 | 9   | 1 | 1.1144e+02 | 5.3162e+02 |
| 6  | 7  | 8   | 1 | 1.1144e+02 | 5.3162e+02 |
| 6  | 5  | 10  | 1 | 1.2342e+02 | 5.3831e+02 |
| 7  | 8  | 14  | 1 | 1.1063e+02 | 5.2894e+02 |
| 7  | 8  | 9   | 1 | 1.1063e+02 | 5.2894e+02 |
| 8  | 14 | 15  | 1 | 1.1063e+02 | 5.2894e+02 |
| 8  | 14 | 13  | 1 | 1.1063e+02 | 5.2894e+02 |
| 8  | 9  | 10  | 1 | 1.1063e+02 | 5.2894e+02 |
| 8  | 9  | 11  | 1 | 1.1063e+02 | 5.2894e+02 |
| 9  | 10 | 19  | 1 | 1.1063e+02 | 5.2894e+02 |
| 9  | 11 | 12  | 1 | 1.1063e+02 | 5.2894e+02 |
| 9  | 8  | 14  | 1 | 1.1063e+02 | 5.2894e+02 |
| 10 | 9  | 11  | 1 | 1.1063e+02 | 5.2894e+02 |
| 11 | 12 | 13  | 1 | 1.1063e+02 | 5.2894e+02 |
| 12 | 13 | 18  | 1 | 1.1063e+02 | 5.2894e+02 |
| 12 | 13 | 17  | 1 | 1.1063e+02 | 5.2894e+02 |
| 12 | 13 | 14  | 1 | 1.1063e+02 | 5.2894e+02 |
| 13 | 17 | 20  | 1 | 1.1063e+02 | 5.2894e+02 |
| 13 | 17 | 16  | 1 | 1.1063e+02 | 5.2894e+02 |
| 13 | 14 | 15  | 1 | 1.1063e+02 | 5.2894e+02 |
| 14 | 15 | 16  | 1 | 1.1063e+02 | 5.2894e+02 |
| 14 | 13 | 18  | 1 | 1.1063e+02 | 5.2894e+02 |
| 14 | 13 | 17  | 1 | 1.1063e+02 | 5.2894e+02 |
| 15 | 16 | 17  | 1 | 1.1063e+02 | 5.2894e+02 |
| 16 | 17 | 20  | 1 | 1.1063e+02 | 5.2894e+02 |
| 17 | 13 | 18  | 1 | 1.1063e+02 | 5.2894e+02 |
| 17 | 20 | 22  | 1 | 1.1063e+02 | 5.2894e+02 |
| 17 | 20 | 21  | 1 | 1.1063e+02 | 5.2894e+02 |
| 20 | 22 | 23  | 1 | 1.1063e+02 | 5.2894e+02 |
| 21 | 20 | 22  | 1 | 1.1063e+02 | 5.2894e+02 |
| 22 | 23 | 24  | 1 | 1.1063e+02 | 5.2894e+02 |
| 23 | 24 | 25  | 1 | 1.1063e+02 | 5.2894e+02 |
| 24 | 25 | 27  | 1 | 1.1063e+02 | 5.2894e+02 |
| 24 | 25 | 26  | 1 | 1.1063e+02 | 5.2894e+02 |
| 26 | 25 | 27  | 1 | 1.1063e+02 | 5.2894e+02 |
| 28 | 31 | 77  | 1 | 1.2371e+02 | 5.3798e+02 |
| 29 | 28 | 31  | 1 | 1.0928e+02 | 6.4166e+02 |
| 29 | 28 | 30  | 1 | 1.2333e+02 | 6.3538e+02 |
| 30 | 28 | 31  | 1 | 1.2203e+02 | 6.3455e+02 |
| 31 | 77 | 83  | 1 | 1.1989e+02 | 5.6877e+02 |
| 31 | 77 | 79  | 1 | 1.1989e+02 | 5.6877e+02 |
| 77 | 83 | 88  | 1 | 1.1989e+02 | 5.6877e+02 |
| 77 | 83 | 82  | 1 | 1.1997e+02 | 5.6216e+02 |
| 77 | 79 | 80  | 1 | 1.1997e+02 | 5.6216e+02 |
| 79 | 80 | 81  | 1 | 1.1997e+02 | 5.6216e+02 |
| 79 | 77 | 83  | 1 | 1.1997e+02 | 5.6216e+02 |
| 80 | 81 | 82  | 1 | 1.1997e+02 | 5.6216e+02 |
| 81 | 82 | 83  | 1 | 1.1997e+02 | 5.6216e+02 |

|    |    |    |   |            |            |
|----|----|----|---|------------|------------|
| 82 | 83 | 88 | 1 | 1.1989e+02 | 5.6877e+02 |
| 83 | 88 | 89 | 1 | 1.2371e+02 | 5.3798e+02 |
| 88 | 89 | 92 | 1 | 1.1514e+02 | 5.7296e+02 |
| 88 | 89 | 91 | 1 | 1.2203e+02 | 6.3455e+02 |
| 89 | 92 | 97 | 1 | 1.1794e+02 | 5.6660e+02 |
| 89 | 92 | 93 | 1 | 1.2014e+02 | 5.4091e+02 |
| 91 | 89 | 92 | 1 | 1.2344e+02 | 5.7463e+02 |
| 92 | 97 | 96 | 1 | 1.1586e+02 | 5.7396e+02 |
| 92 | 93 | 94 | 1 | 1.1997e+02 | 5.6216e+02 |
| 93 | 94 | 95 | 1 | 1.1997e+02 | 5.6216e+02 |
| 93 | 92 | 97 | 1 | 1.2263e+02 | 5.7873e+02 |
| 94 | 95 | 96 | 1 | 1.1997e+02 | 5.6216e+02 |
| 95 | 96 | 97 | 1 | 1.2263e+02 | 5.7873e+02 |

[ dihedrals ]

| ;i | j  | k  | l  | func | C0       | ...      | C5        |          |         |         |         |   |
|----|----|----|----|------|----------|----------|-----------|----------|---------|---------|---------|---|
| 1  | 10 | 19 | 44 | 3    | 0.66944  | 2.00832  | 0.00000   | -2.67776 | 0.00000 | 0.00000 | 0.00000 | ; |
| 1  | 10 | 19 | 43 | 3    | 0.66944  | 2.00832  | 0.00000   | -2.67776 | 0.00000 | 0.00000 | 0.00000 | ; |
| 1  | 10 | 19 | 42 | 3    | 0.66944  | 2.00832  | 0.00000   | -2.67776 | 0.00000 | 0.00000 | 0.00000 | ; |
| 1  | 10 | 9  | 45 | 3    | 0.66944  | 2.00832  | 0.00000   | -2.67776 | 0.00000 | 0.00000 | 0.00000 | ; |
| 1  | 2  | 3  | 34 | 3    | 0.65270  | 1.95811  | 0.00000   | -2.61082 | 0.00000 | 0.00000 | 0.00000 | ; |
| 2  | 3  | 4  | 33 | 3    | 0.66944  | 2.00832  | 0.00000   | -2.67776 | 0.00000 | 0.00000 | 0.00000 | ; |
| 2  | 3  | 4  | 32 | 3    | 0.66944  | 2.00832  | 0.00000   | -2.67776 | 0.00000 | 0.00000 | 0.00000 | ; |
| 38 | 1  | 2  | 3  | 3    | 0.66944  | 2.00832  | 0.00000   | -2.67776 | 0.00000 | 0.00000 | 0.00000 | ; |
| 37 | 1  | 2  | 3  | 3    | 0.66944  | 2.00832  | 0.00000   | -2.67776 | 0.00000 | 0.00000 | 0.00000 | ; |
| 4  | 5  | 6  | 39 | 3    | 55.64720 | 0.00000  | -55.64720 | 0.00000  | 0.00000 | 0.00000 | 0.00000 | ; |
| 4  | 3  | 2  | 36 | 3    | 0.66944  | 2.00832  | 0.00000   | -2.67776 | 0.00000 | 0.00000 | 0.00000 | ; |
| 4  | 3  | 2  | 35 | 3    | 0.66944  | 2.00832  | 0.00000   | -2.67776 | 0.00000 | 0.00000 | 0.00000 | ; |
| 5  | 6  | 7  | 41 | 3    | 6.40152  | -9.58136 | 0.00000   | 6.35968  | 0.00000 | 0.00000 | 0.00000 | ; |
| 5  | 6  | 7  | 40 | 3    | 6.40152  | -9.58136 | 0.00000   | 6.35968  | 0.00000 | 0.00000 | 0.00000 | ; |
| 38 | 1  | 10 | 5  | 3    | 0.65270  | 1.95811  | 0.00000   | -2.61082 | 0.00000 | 0.00000 | 0.00000 | ; |
| 37 | 1  | 10 | 5  | 3    | 0.65270  | 1.95811  | 0.00000   | -2.61082 | 0.00000 | 0.00000 | 0.00000 | ; |
| 5  | 10 | 19 | 44 | 3    | 0.65270  | 1.95811  | 0.00000   | -2.61082 | 0.00000 | 0.00000 | 0.00000 | ; |
| 5  | 10 | 19 | 43 | 3    | 0.65270  | 1.95811  | 0.00000   | -2.61082 | 0.00000 | 0.00000 | 0.00000 | ; |
| 5  | 10 | 19 | 42 | 3    | 0.65270  | 1.95811  | 0.00000   | -2.61082 | 0.00000 | 0.00000 | 0.00000 | ; |
| 5  | 10 | 9  | 45 | 3    | 0.65270  | 1.95811  | 0.00000   | -2.61082 | 0.00000 | 0.00000 | 0.00000 | ; |
| 5  | 4  | 3  | 34 | 3    | 0.65270  | 1.95811  | 0.00000   | -2.61082 | 0.00000 | 0.00000 | 0.00000 | ; |
| 6  | 7  | 8  | 46 | 3    | 0.65270  | 1.95811  | 0.00000   | -2.61082 | 0.00000 | 0.00000 | 0.00000 | ; |
| 6  | 5  | 4  | 33 | 3    | 6.40152  | -9.58136 | 0.00000   | 6.35968  | 0.00000 | 0.00000 | 0.00000 | ; |
| 6  | 5  | 4  | 32 | 3    | 6.40152  | -9.58136 | 0.00000   | 6.35968  | 0.00000 | 0.00000 | 0.00000 | ; |
| 7  | 8  | 14 | 51 | 3    | 0.66944  | 2.00832  | 0.00000   | -2.67776 | 0.00000 | 0.00000 | 0.00000 | ; |
| 7  | 8  | 9  | 45 | 3    | 0.66944  | 2.00832  | 0.00000   | -2.67776 | 0.00000 | 0.00000 | 0.00000 | ; |
| 8  | 14 | 15 | 59 | 3    | 0.66944  | 2.00832  | 0.00000   | -2.67776 | 0.00000 | 0.00000 | 0.00000 | ; |
| 8  | 14 | 15 | 58 | 3    | 0.66944  | 2.00832  | 0.00000   | -2.67776 | 0.00000 | 0.00000 | 0.00000 | ; |
| 8  | 9  | 11 | 48 | 3    | 0.66944  | 2.00832  | 0.00000   | -2.67776 | 0.00000 | 0.00000 | 0.00000 | ; |
| 8  | 9  | 11 | 47 | 3    | 0.66944  | 2.00832  | 0.00000   | -2.67776 | 0.00000 | 0.00000 | 0.00000 | ; |
| 8  | 7  | 6  | 39 | 3    | 0.00000  | 0.00000  | 0.00000   | 0.00000  | 0.00000 | 0.00000 | 0.00000 | ; |
| 38 | 1  | 10 | 9  | 3    | 0.66944  | 2.00832  | 0.00000   | -2.67776 | 0.00000 | 0.00000 | 0.00000 | ; |
| 37 | 1  | 10 | 9  | 3    | 0.66944  | 2.00832  | 0.00000   | -2.67776 | 0.00000 | 0.00000 | 0.00000 | ; |
| 9  | 10 | 19 | 44 | 3    | 0.66944  | 2.00832  | 0.00000   | -2.67776 | 0.00000 | 0.00000 | 0.00000 | ; |
| 9  | 10 | 19 | 43 | 3    | 0.66944  | 2.00832  | 0.00000   | -2.67776 | 0.00000 | 0.00000 | 0.00000 | ; |
| 9  | 10 | 19 | 42 | 3    | 0.66944  | 2.00832  | 0.00000   | -2.67776 | 0.00000 | 0.00000 | 0.00000 | ; |
| 9  | 11 | 12 | 50 | 3    | 0.66944  | 2.00832  | 0.00000   | -2.67776 | 0.00000 | 0.00000 | 0.00000 | ; |
| 9  | 11 | 12 | 49 | 3    | 0.66944  | 2.00832  | 0.00000   | -2.67776 | 0.00000 | 0.00000 | 0.00000 | ; |
| 9  | 8  | 14 | 51 | 3    | 0.66944  | 2.00832  | 0.00000   | -2.67776 | 0.00000 | 0.00000 | 0.00000 | ; |
| 9  | 8  | 7  | 41 | 3    | 0.66944  | 2.00832  | 0.00000   | -2.67776 | 0.00000 | 0.00000 | 0.00000 | ; |
| 9  | 8  | 7  | 40 | 3    | 0.66944  | 2.00832  | 0.00000   | -2.67776 | 0.00000 | 0.00000 | 0.00000 | ; |
| 10 | 1  | 2  | 36 | 3    | 0.66944  | 2.00832  | 0.00000   | -2.67776 | 0.00000 | 0.00000 | 0.00000 | ; |
| 10 | 1  | 2  | 35 | 3    | 0.66944  | 2.00832  | 0.00000   | -2.67776 | 0.00000 | 0.00000 | 0.00000 | ; |
| 10 | 9  | 11 | 48 | 3    | 0.66944  | 2.00832  | 0.00000   | -2.67776 | 0.00000 | 0.00000 | 0.00000 | ; |
| 10 | 9  | 11 | 47 | 3    | 0.66944  | 2.00832  | 0.00000   | -2.67776 | 0.00000 | 0.00000 | 0.00000 | ; |
| 10 | 9  | 8  | 46 | 3    | 0.66944  | 2.00832  | 0.00000   | -2.67776 | 0.00000 | 0.00000 | 0.00000 | ; |
| 10 | 5  | 6  | 39 | 3    | 55.64720 | 0.00000  | -55.64720 | 0.00000  | 0.00000 | 0.00000 | 0.00000 | ; |
| 10 | 5  | 4  | 33 | 3    | 0.00000  | 0.00000  | 0.00000   | 0.00000  | 0.00000 | 0.00000 | 0.00000 | ; |
| 10 | 5  | 4  | 32 | 3    | 0.00000  | 0.00000  | 0.00000   | 0.00000  | 0.00000 | 0.00000 | 0.00000 | ; |
| 11 | 9  | 8  | 46 | 3    | 0.66944  | 2.00832  | 0.00000   | -2.67776 | 0.00000 | 0.00000 | 0.00000 | ; |
| 12 | 11 | 9  | 45 | 3    | 0.66944  | 2.00832  | 0.00000   | -2.67776 | 0.00000 | 0.00000 | 0.00000 | ; |
| 12 | 13 | 18 | 54 | 3    | 0.66944  | 2.00832  | 0.00000   | -2.67776 | 0.00000 | 0.00000 | 0.00000 | ; |
| 12 | 13 | 18 | 53 | 3    | 0.66944  | 2.00832  | 0.00000   | -2.67776 | 0.00000 | 0.00000 | 0.00000 | ; |
| 12 | 13 | 18 | 52 | 3    | 0.66944  | 2.00832  | 0.00000   | -2.67776 | 0.00000 | 0.00000 | 0.00000 | ; |
| 12 | 13 | 17 | 55 | 3    | 0.66944  | 2.00832  | 0.00000   | -2.67776 | 0.00000 | 0.00000 | 0.00000 | ; |
| 12 | 13 | 14 | 51 | 3    | 0.66944  | 2.00832  | 0.00000   | -2.67776 | 0.00000 | 0.00000 | 0.00000 | ; |
| 13 | 12 | 11 | 48 | 3    | 0.66944  | 2.00832  | 0.00000   | -2.67776 | 0.00000 | 0.00000 | 0.00000 | ; |
| 13 | 12 | 11 | 47 | 3    | 0.66944  | 2.00832  | 0.00000   | -2.67776 | 0.00000 | 0.00000 | 0.00000 | ; |
| 13 | 17 | 20 | 60 | 3    | 0.66944  | 2.00832  | 0.00000   | -2.67776 | 0.00000 | 0.00000 | 0.00000 | ; |
| 13 | 17 | 16 | 57 | 3    | 0.66944  | 2.00832  | 0.00000   | -2.67776 | 0.00000 | 0.00000 | 0.00000 | ; |
| 13 | 17 | 16 | 56 | 3    | 0.66944  | 2.00832  | 0.00000   | -2.67776 | 0.00000 | 0.00000 | 0.00000 | ; |
| 13 | 14 | 15 | 59 | 3    | 0.66944  | 2.00832  | 0.00000   | -2.67776 | 0.00000 | 0.00000 | 0.00000 | ; |
| 13 | 14 | 15 | 58 | 3    | 0.66944  | 2.00832  | 0.00000   | -2.67776 | 0.00000 | 0.00000 | 0.00000 | ; |
| 13 | 14 | 8  | 46 | 3    | 0.66944  | 2.00832  | 0.00000   | -2.67776 | 0.00000 | 0.00000 | 0.00000 | ; |
| 14 | 15 | 16 | 57 | 3    | 0.66944  | 2.00832  | 0.00000   | -2.67776 | 0.00000 | 0.00000 | 0.00000 | ; |
| 14 | 15 | 16 | 56 | 3    | 0.66944  | 2.00832  | 0.00000   | -2.67776 | 0.00000 | 0.00000 | 0.00000 | ; |
| 14 | 13 | 12 | 50 | 3    | 0.66944  | 2.00832  | 0.00000   | -2.67776 | 0.00000 | 0.00000 | 0.00000 | ; |
| 14 | 13 | 12 | 49 | 3    | 0.66944  | 2.00832  | 0.00000   | -2.67776 | 0.00000 | 0.00000 | 0.00000 | ; |
| 14 | 13 | 18 | 54 | 3    | 0.66944  | 2.00832  | 0.00000   | -2.67776 | 0.00000 | 0.00000 | 0.00000 | ; |
| 14 | 13 | 18 | 53 | 3    | 0.66944  | 2.00832  | 0.00000   | -2.67776 | 0.00000 | 0.00000 | 0.00000 | ; |
| 14 | 13 | 18 | 52 | 3    | 0.66944  | 2.00832  | 0.00000   | -2.67776 | 0.00000 | 0.00000 | 0.00000 | ; |
| 14 | 13 | 17 | 55 | 3    | 0.66944  | 2.00832  | 0.00000   | -2.67776 | 0.00000 | 0.00000 | 0.00000 | ; |
| 14 | 8  | 9  | 45 | 3    | 0.66944  | 2.00832  | 0.00000   | -2.67776 | 0.00000 | 0.00000 | 0.00000 | ; |
| 14 | 8  | 7  | 41 | 3    | 0.66944  | 2.00832  | 0.00000   | -2.67776 | 0.00000 | 0.00000 | 0.00000 | ; |
